# Supplementary material
Source: PubMed Central journal article supplement (PMC3037416)

**Supplemental Figure Legend:**

**Figure S1:** Plasma glucose (S1A) and insulin (S1B) concentrations during a 24-h period (0800–0800 h) in hypertriacylglycerolemic male subject (fasting [TG] = 198 mg/dl) consuming HFCS-, sucrose-, fructose- and glucose-sweetened beverages with each meal. Change of plasma leptin concentration (S1C) over the morning nadir and plasma TG (S1D) concentrations from mean baseline levels (0800–0900 h) during a 24-h period (0800–0800 h) in hypertriacylglycerolemic male subject consuming HFCS-, sucrose-, fructose- and glucose-sweetened beverages with each meal.

Figure S1

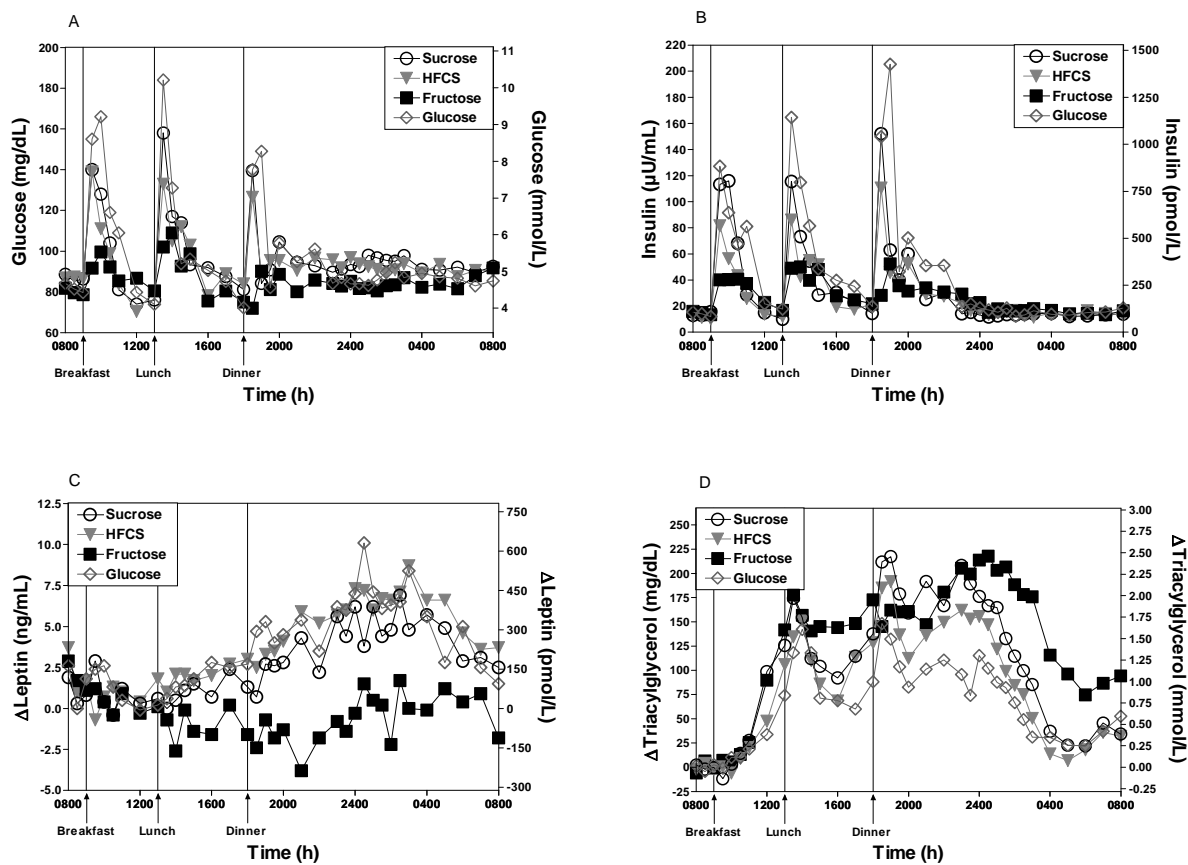

Supplement: NIHMS269840-supplement-1.pdf [file NIHMS269840-supplement-1.pdf]
